# Supplementary material for: Glucose uptake by GLUT1 in photoreceptors is essential for outer segment renewal and rod photoreceptor survival
Source: PubMed Central journal article supplement — FASEB J. 2022 Jun 29;36(8):e22428. doi: 10.1096/fj.202200369R (PMC9438481; doi:10.1096/fj.202200369r), 2022-06-29
Supplement: NIHMS1816142-supplement-fS1.pdf [file NIHMS1816142-supplement-fS1.pdf]

## Supplementary Figure 1

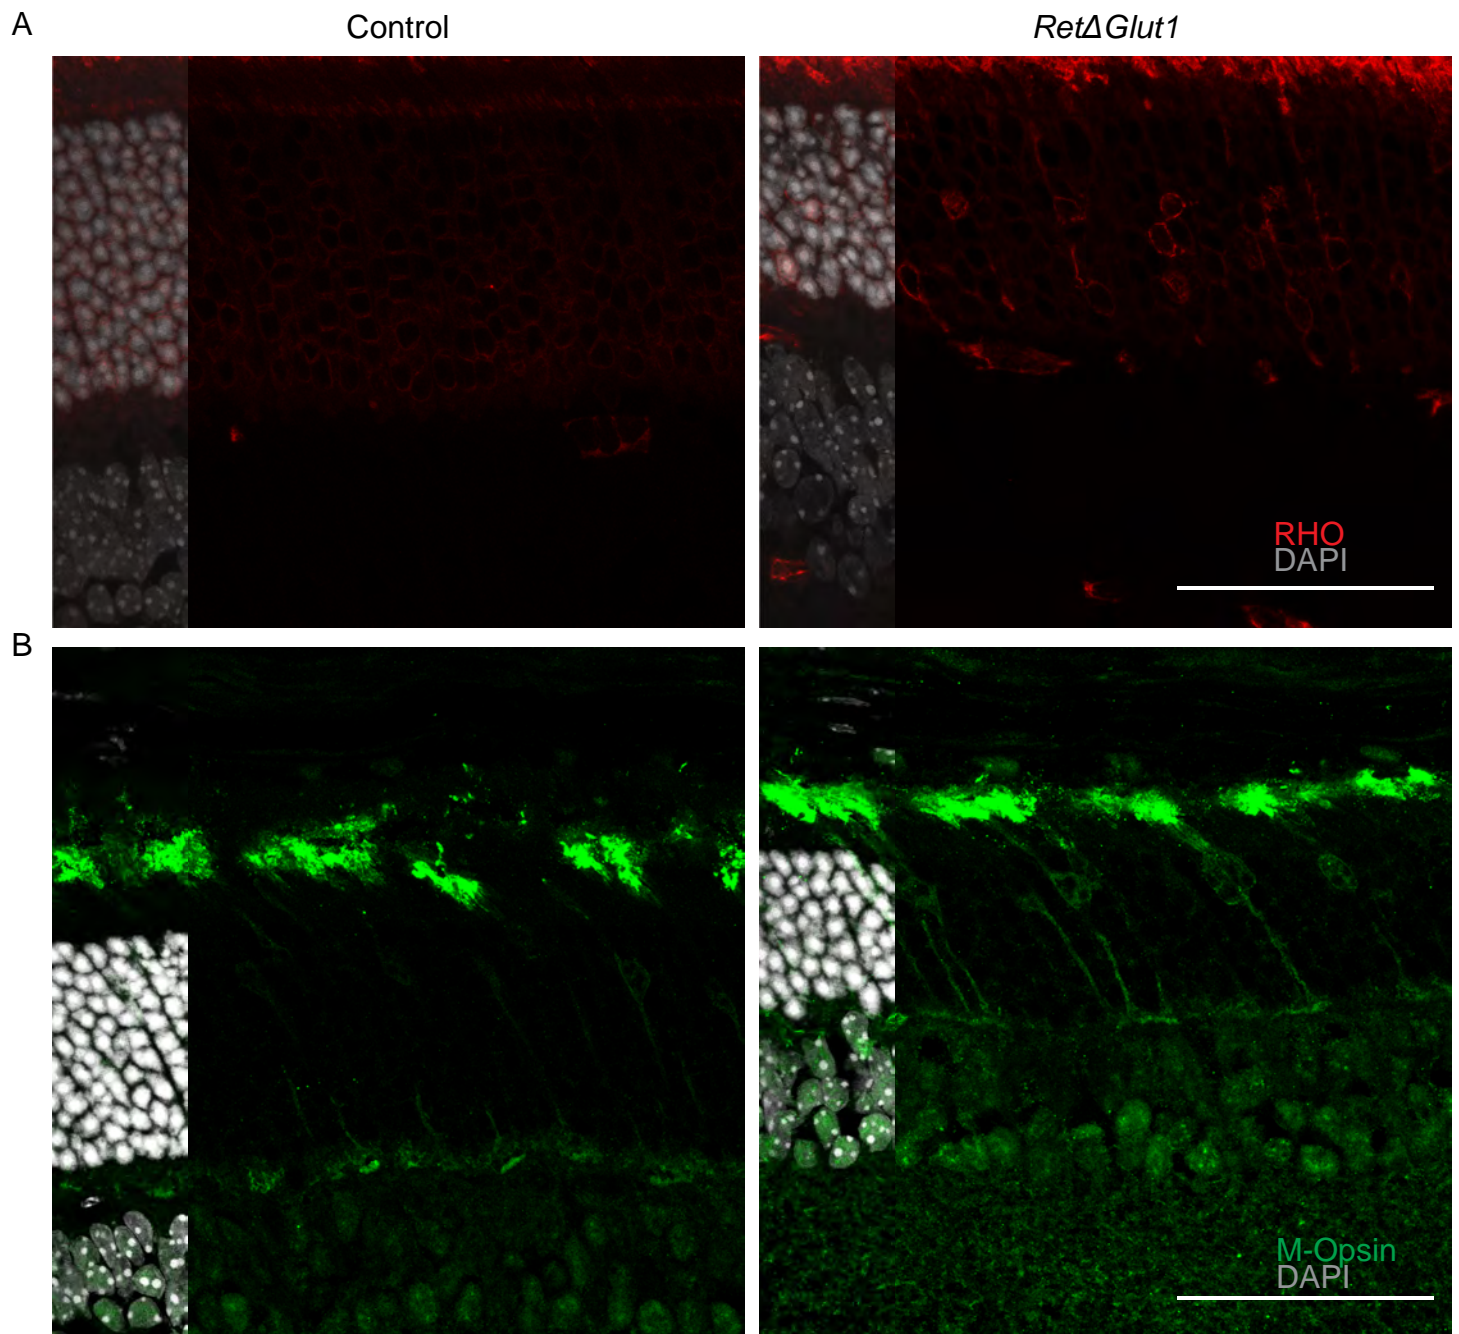

### Supplementary FIGURE 1 Reduced Opsin trafficking to the OS, with loss of *Slc2a1* in the retina

A) RHO immunofluorescence (Red) in retina cryosections from control and *RetΔGlut1* mice at 1 month of age, counterstained with DAPI (gray). Scale bar indicates 50 μm.

B) M-Opsin immunofluorescence (Green) in retina cryosections from control and *RetΔGlut1* mice at 1 month of age, counterstained with DAPI (gray). Scale bar indicates 50 μm.
