# Supplementary material for: Glucose uptake by GLUT1 in photoreceptors is essential for outer segment renewal and rod photoreceptor survival
Source: PubMed Central journal article supplement — FASEB J. 2022 Jun 29;36(8):e22428. doi: 10.1096/fj.202200369R (PMC9438481; doi:10.1096/fj.202200369r), 2022-06-29
Supplement: NIHMS1816142-supplement-fS2.pdf [file NIHMS1816142-supplement-fS2.pdf]

## Supplementary Figure 2

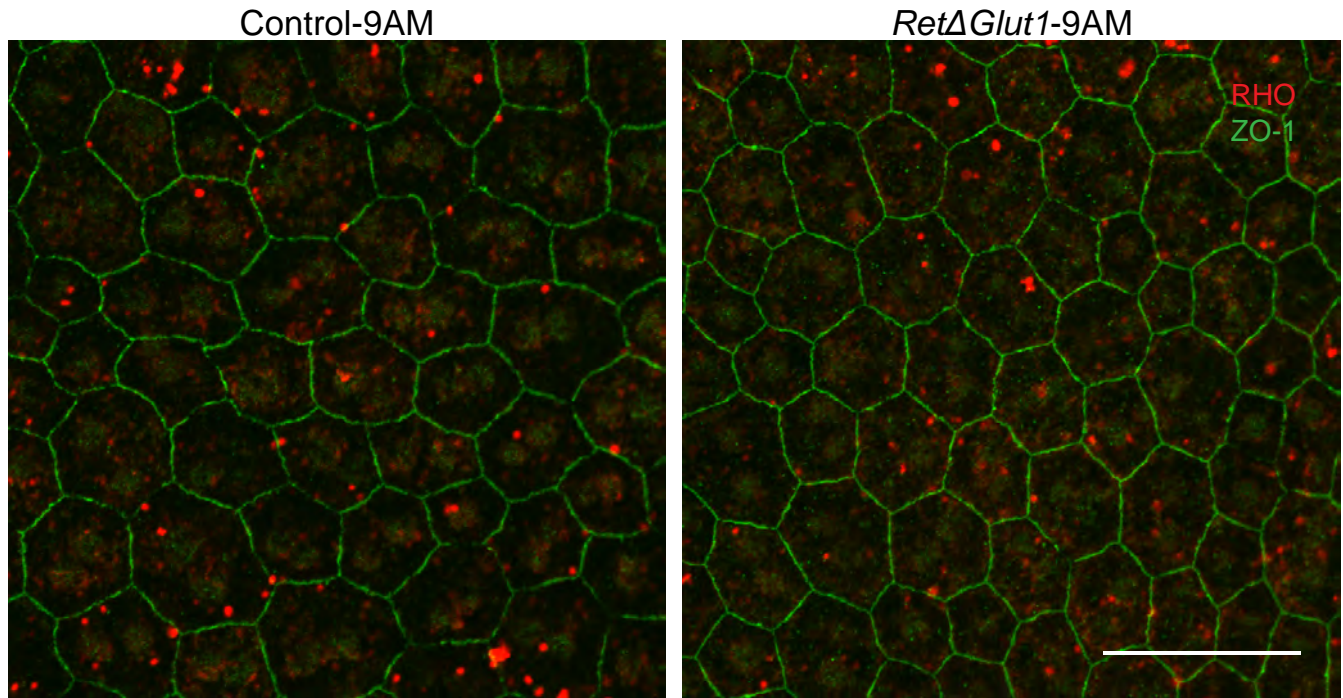

### Supplementary FIGURE 2 Normal uptake of rod OS by RPE in *RetΔGlut1*

RPE flat mounts stained with RHO (Red) and ZO-1 (Green) from mice sacrificed 2-3 hours after light onset from 1 month old mice. Scale bar indicates 50  $\mu$ m.
