# Supplementary material for: Glucose uptake by GLUT1 in photoreceptors is essential for outer segment renewal and rod photoreceptor survival
Source: PubMed Central journal article supplement — FASEB J. 2022 Jun 29;36(8):e22428. doi: 10.1096/fj.202200369R (PMC9438481; doi:10.1096/fj.202200369r), 2022-06-29
Supplement: NIHMS1816142-supplement-fS3.pdf [file NIHMS1816142-supplement-fS3.pdf]

## Supplementary Figure 3

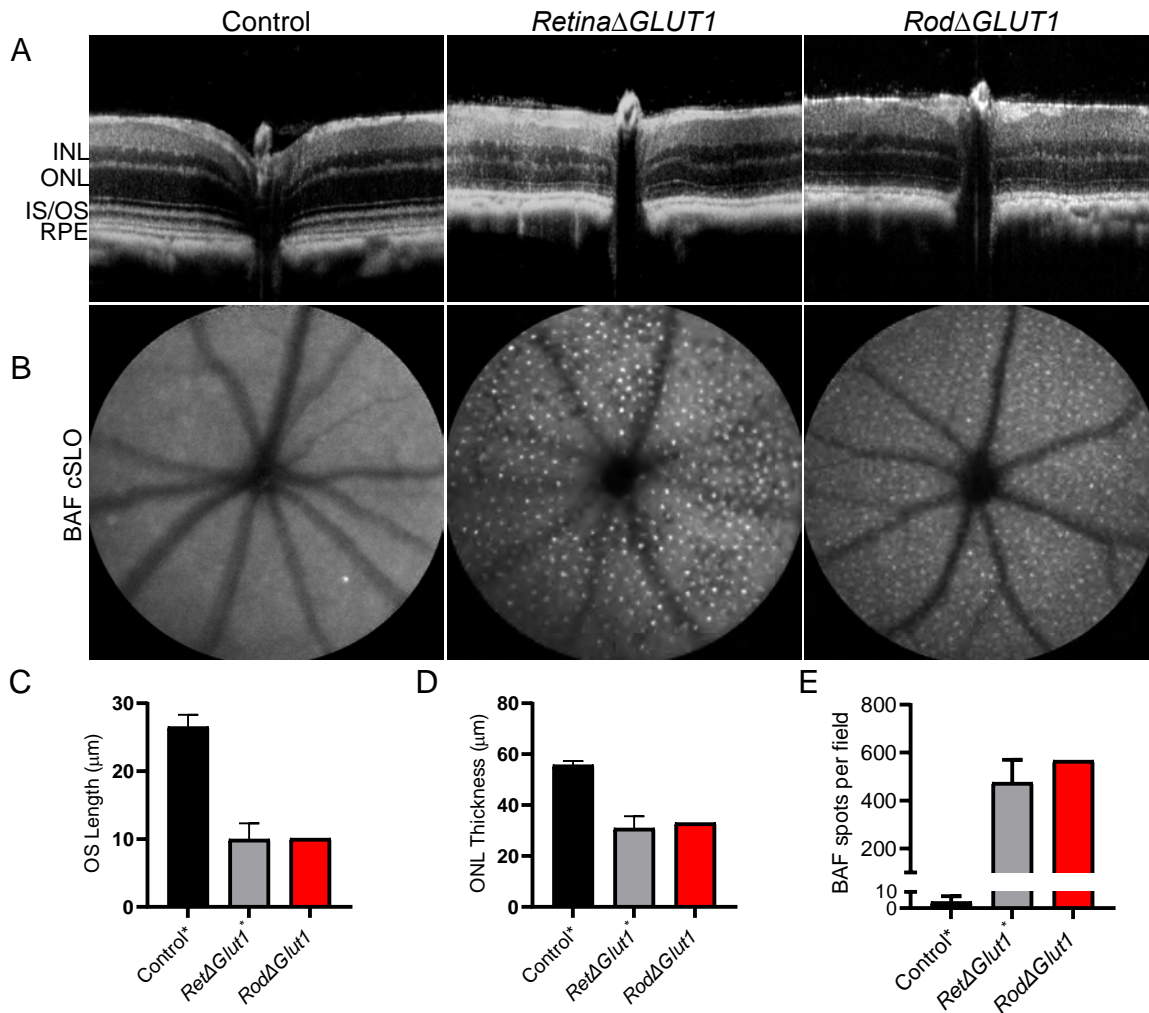

**Supplementary FIGURE 3** Live animal imaging of *RetΔGlut1* and *RodΔGlut1* at 4 months of age or 4 months post tamoxifen reveals a similar anatomical phenotype

- A) Averaged SD-OCT B-scan from the horizontal meridian of retinas from 4-month-old control, 4-month-old *RetΔGlut1* (Figure 3A) and 4-month post-tamoxifen injected *RodΔGlut1* mice (N=2). INL, ONL, IS/OS and RPE are indicated.
- B) Representative 55° wide-field BAF-cSLO images obtained from 4-month-old control, 4-month-old *RetΔGlut1* (Figure 6A) and 4-month post-tamoxifen injected *RodΔGlut1* mice (N=2).
- C) ONL layer thickness measured from volumetric SD-OCT scans from 4-month-old control, 4-month-old *RetΔGlut1* (Figure 3B) and 4-month post-tamoxifen injected *RodΔGlut1* mice (N=2). Data points indicate average ( $\pm$  SD)
- D) OS layer thickness measured from volumetric SD-OCT scans from 4-month-old control, 4-month-old *RetΔGlut1* (Figure 3F) and 4-month post-tamoxifen injected *RodΔGlut1* mice (N=2). Data points indicate average ( $\pm$  SD)
- E) Number of BAF-cSLO identified hyperfluorescent foci from 4-month-old control, 4-month-old *RetΔGlut1* (Figure 6B) and 4-month post-tamoxifen injected *RodΔGlut1* mice (N=2). Data points indicate average ( $\pm$  SD)
