# Supplementary material for: Glucose uptake by GLUT1 in photoreceptors is essential for outer segment renewal and rod photoreceptor survival
Source: PubMed Central journal article supplement — FASEB J. 2022 Jun 29;36(8):e22428. doi: 10.1096/fj.202200369R (PMC9438481; doi:10.1096/fj.202200369r), 2022-06-29
Supplement: NIHMS1816142-supplement-fS4.pdf [file NIHMS1816142-supplement-fS4.pdf]

## Supplementary Figure 4

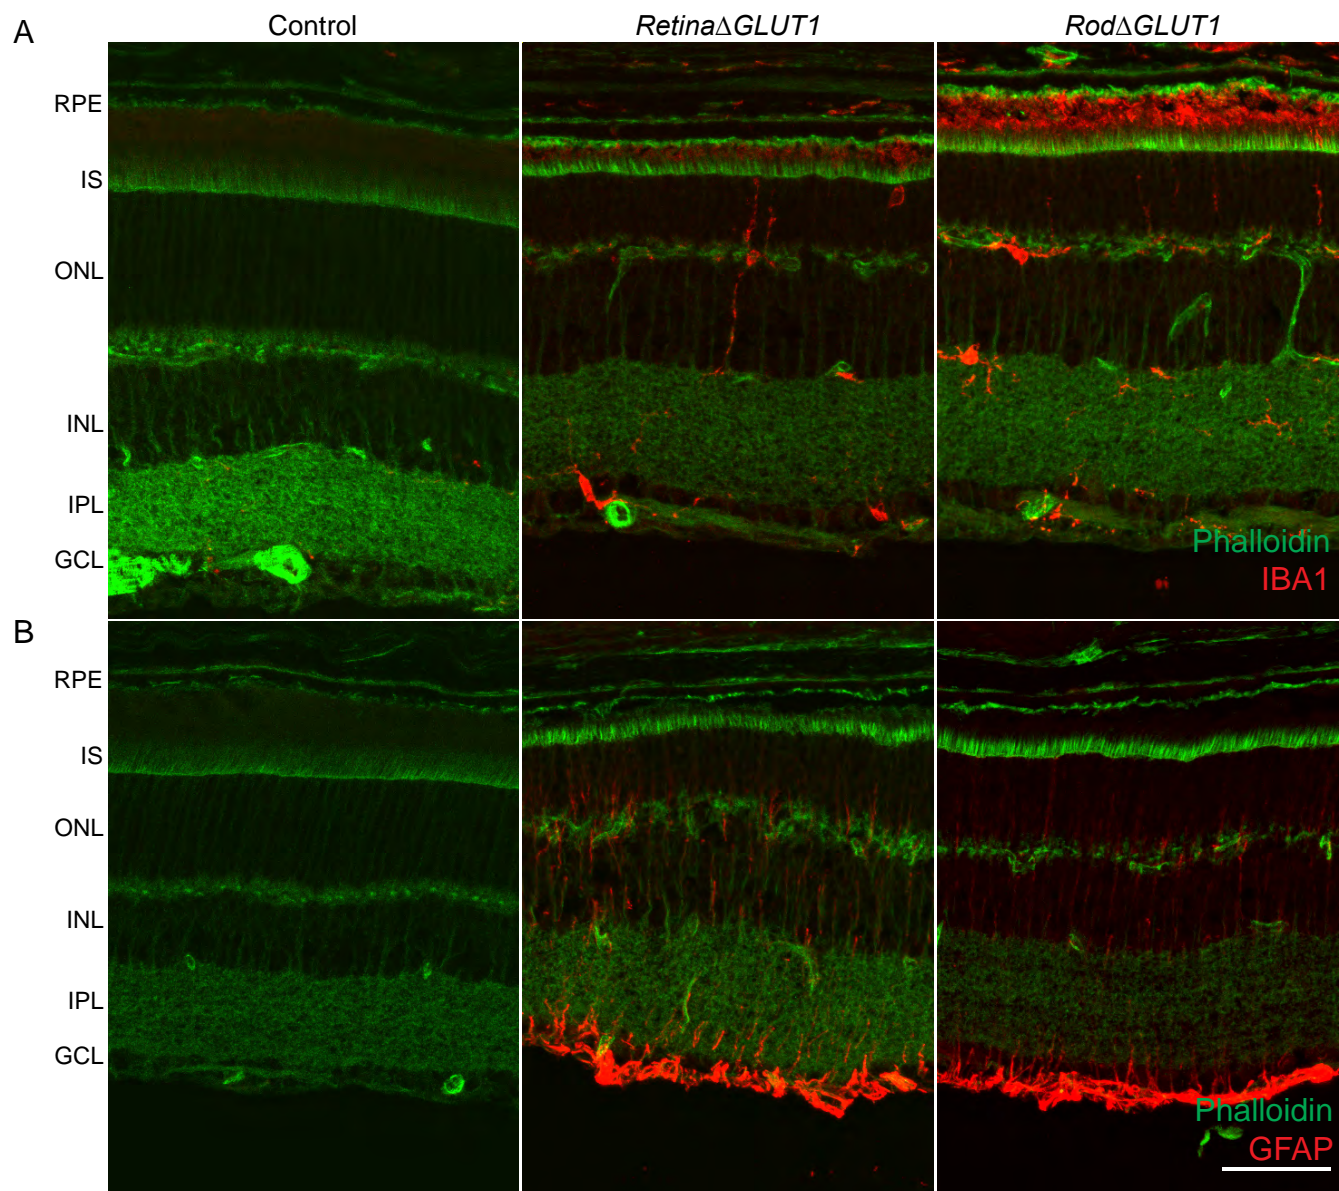

### Supplementary FIGURE 4 Immune cell activation and Müller gliosis

- A) Iba-1 immunofluorescence (red) in retina cryosections from 4-month-old control, 4-month-old *RetΔGlut1* and 4-month post-tamoxifen injected *RodΔGlut1* mice (N=2), counterstained with Phalloidin (green). Scale bar indicates 50 μm.
- B) GFAP immunofluorescence (red) in retina cryosections from 4-month-old control, 4-month-old *RetΔGlut1* and 4-month post-tamoxifen injected *RodΔGlut1* mice (N=2), counterstained with Phalloidin (green). Scale bar indicates 50 μm.
